# Supplementary material for: Open network structures from 2D hydrogen bonded networks: diaminotriazyl tetraoxapentacenes
Source: Royal Society of Chemistry journal article supplement (doi:10.1039/c7ce01247k), 2017-01-01
Supplement: c7ce01247k1.pdf [file c7ce01247k1.pdf]

**Electronic Supplementary Information for:**

**Open Network Structures from 2D Hydrogen Bonded Networks:  
Diaminotriazyl Tetraoxapentacenes**

Kenneth E. Maly,\* William Buck, and Louise N. Dawe\*

*Department of Chemistry and Biochemistry, Wilfrid Laurier University, 75 University Ave. W.  
Waterloo, Ontario N2L 3C5 Canada*

\*To whom correspondence should be addressed. E-mail: *kmaly@wlu.ca*, *ldawe@wlu.ca*

**Contents:**

|                                                              |    |
|--------------------------------------------------------------|----|
| Synthesis .....                                              | S2 |
| Figures S1-S4 – Additional Images of Crystal Structures..... | S3 |
| <sup>1</sup> H and <sup>13</sup> C NMR Spectra .....         | S5 |

## Synthesis

All reagents and starting materials were purchased from Sigma-Aldrich and used as purchased. Anhydrous solvents were dispensed using a custom-built solvent system from Glasscontour (Irvine, CA) which used purification columns packed with activated alumina and supported copper catalyst. Oven-dried glassware was used for all reactions that were performed under nitrogen. High resolution mass spectra were recorded at the Centre Régional de Spectrométrie de Masse à l'Université de Montréal using an Agilent LC-MSD TOF spectrometer.  $^1\text{H}$  and  $^{13}\text{C}$  spectra were recorded on an Agilent Technologies 400 MHz Spectrometer using deuterated DMSO purchased from Sigma-Aldrich. Chemical shifts are reported in  $\delta$  scale downfield from the peak for tetramethylsilane.

### Synthesis of **1**.

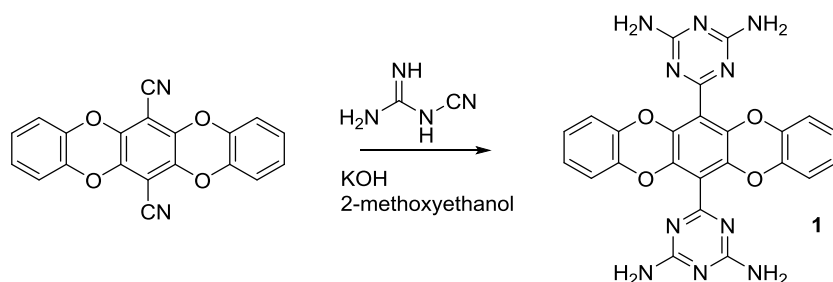

3,13-dicyanobenzo-1,2,4',5'-bis(benzodioxane)<sup>1</sup> (1.00 g, 2.94 mmol), dicyandiamide (0.988 g, 11.8 mmol), and potassium hydroxide (0.225 g, 4.00 mmol) were combined in 2-methoxyethanol (30 mL). The reaction mixture was heated at reflux overnight and then cooled to room temperature. The resulting precipitate was collected by suction filtration and air-dried. Recrystallization from DMSO/water yielded compound **1** as a white solid (1.20 g, 80%).  $^1\text{H}$  NMR (400 MHz, DMSO- $d_6$ )  $\delta$ : 6.86 (m, 8H), 7.02 (br s, 8H);  $^{13}\text{C}$  NMR (100 MHz, DMSO- $d_6$ )  $\delta$ : 121.7, 121.8, 129.8, 139.4, 145.5, 172.0, 172.1; HRMS (ASAP) calc'd for  $\text{C}_{24}\text{H}_{17}\text{N}_{10}\text{O}_4 + \text{H}$   $m/z$  509.1434, found 509.1427.

<sup>1</sup> C. R. Mason, L. Maynard-Atem, N. M. Al-Harbi, P. M. Budd, P. Bernardo, F. Bazzarelli, G. Clarizia and J. C. Jansen, *Macromolecules*, 2011, **44**, 6471-6479.

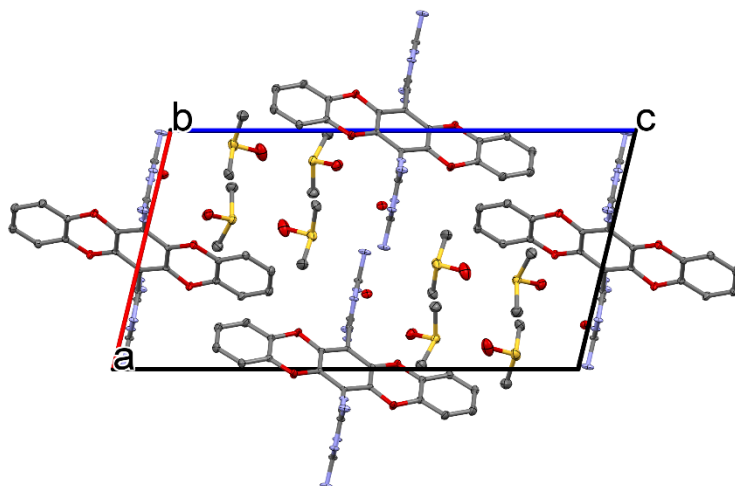

**Figure S1:** View down the c-axis of the structure of  $1 \cdot (\text{DMSO})_4(\text{H}_2\text{O})_2$ , with 50% displacement ellipsoids. Lattice solvent included to show how it is filling the open network formed by **1**. H-atoms omitted for clarity.

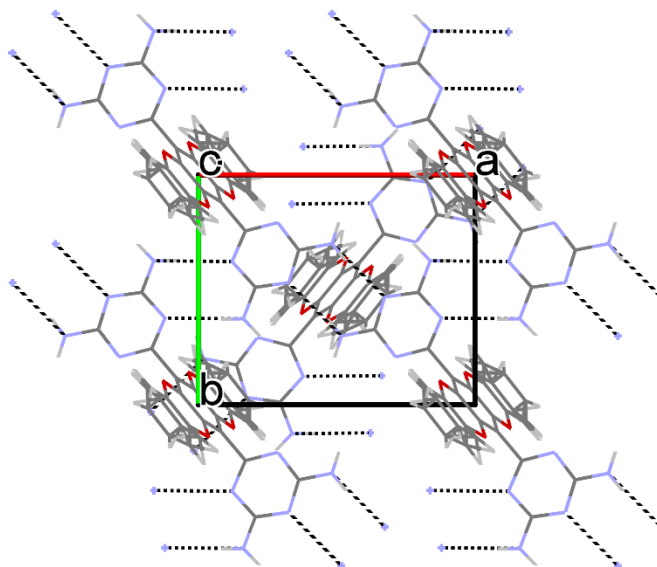

**Figure S2:** View down the c-axis of the structure of  $1 \cdot (\text{CH}_3\text{CN})_x$  showing the two dimensional hydrogen-bonded sheets. Main fragment disorder has been included.

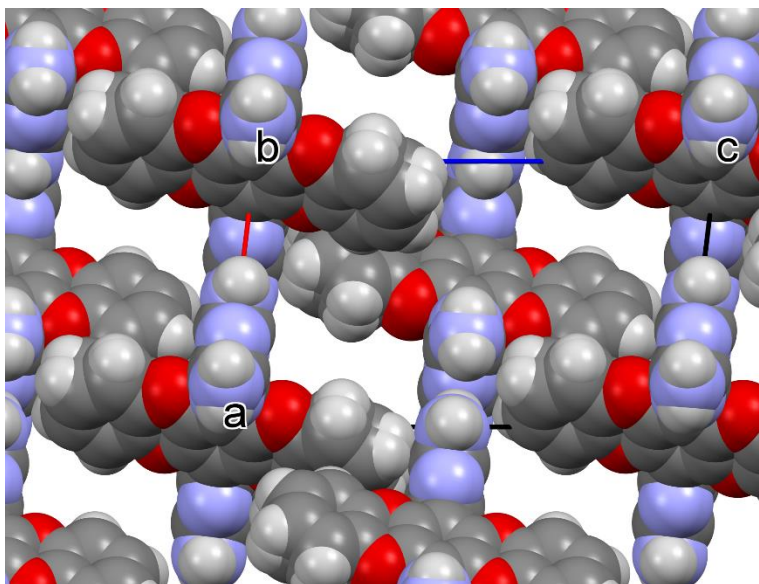

**Figure S3:** View of crystal structure (space filling model) of  $1 \cdot (\text{CH}_3\text{CN})_x$  along the b-axis.

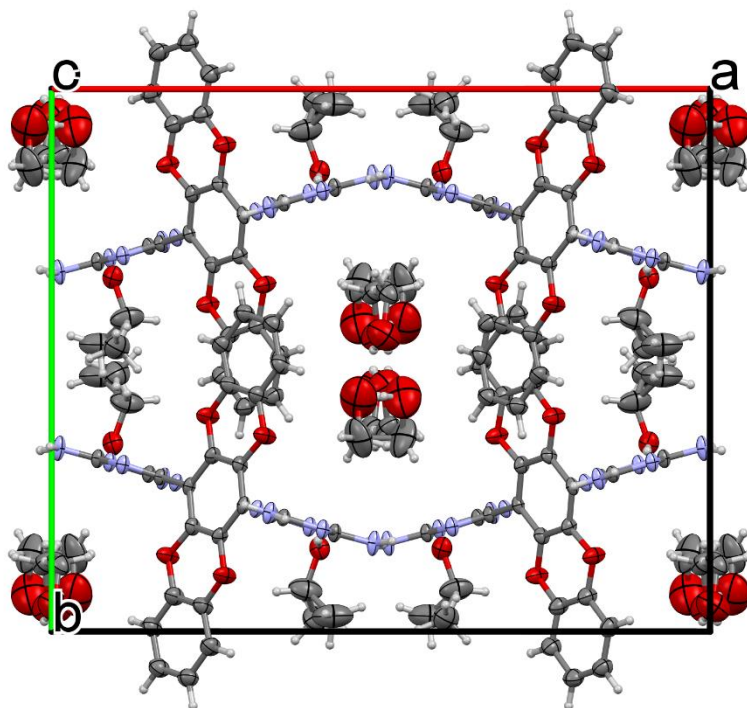

**Figure S4:** View down the c-axis of the structure of  $1 \cdot (\text{EtOH})_4$ , with 50% displacement ellipsoids. Disordered lattice solvent included to show how it is filling the open network formed by **1**.

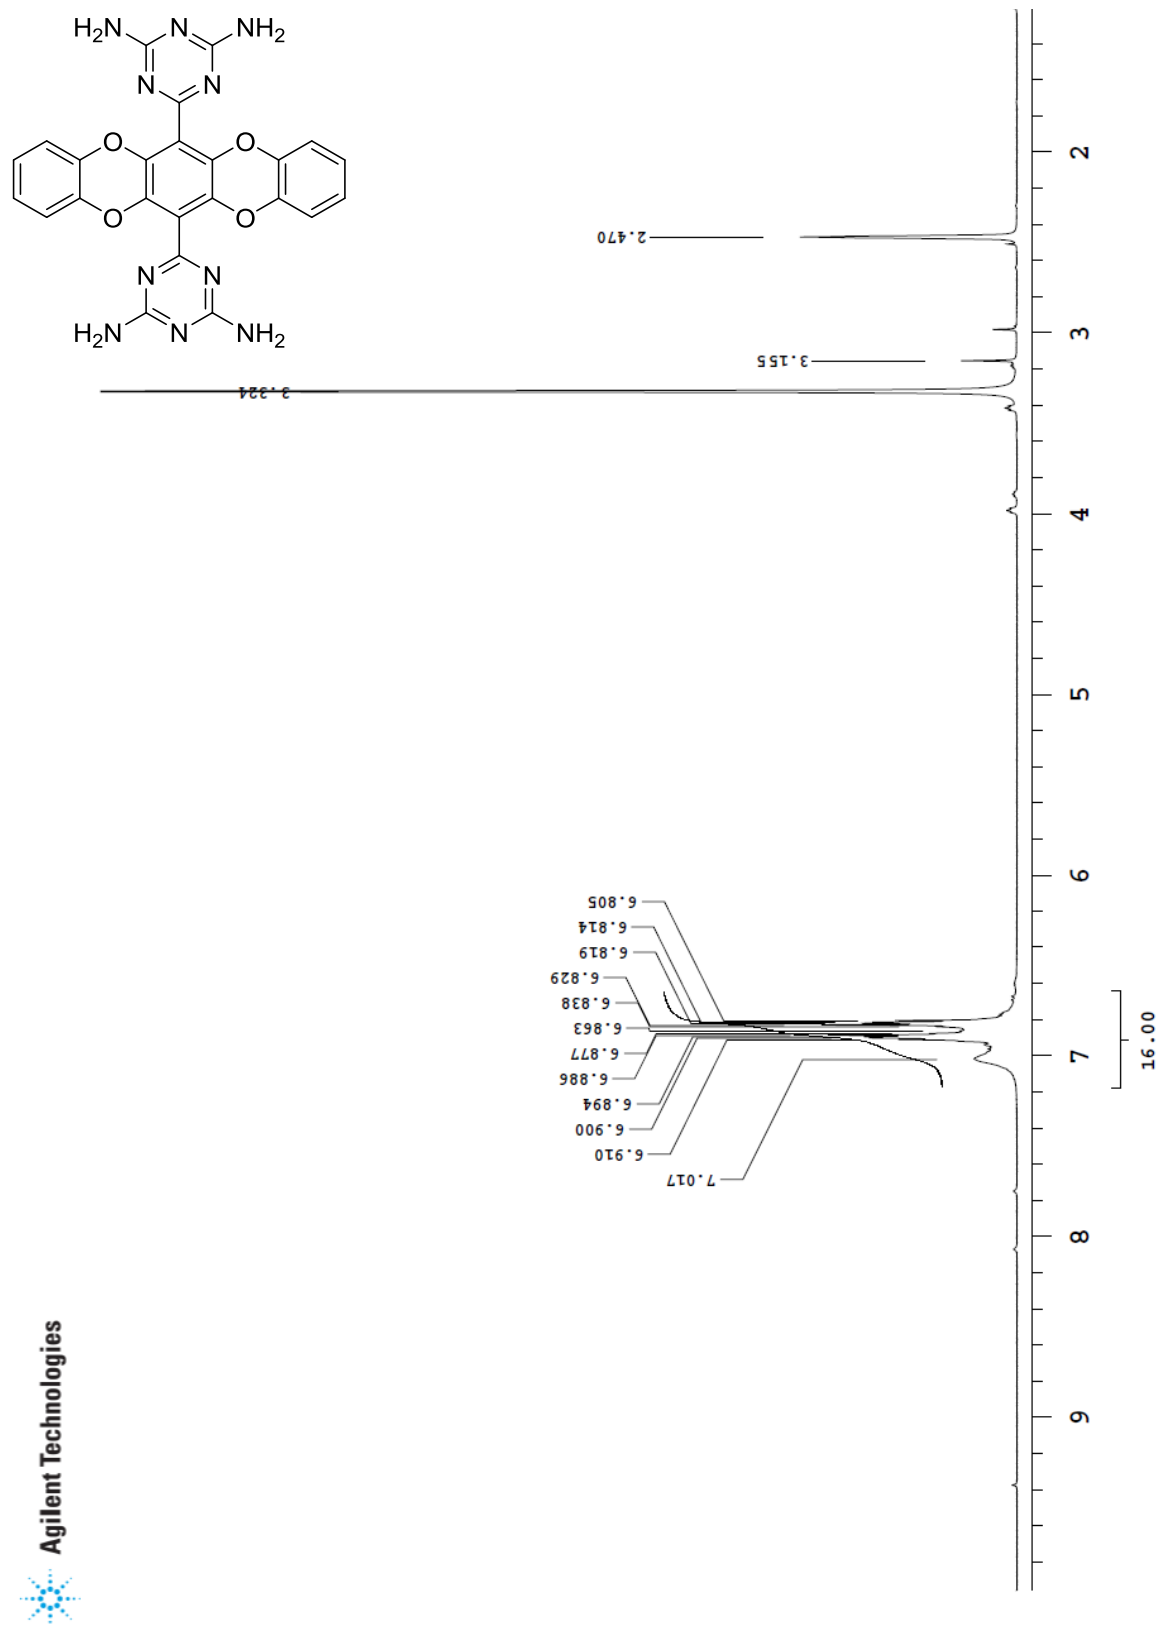

<sup>1</sup>H NMR spectrum of **1** in DMSO-*d*<sub>6</sub>.

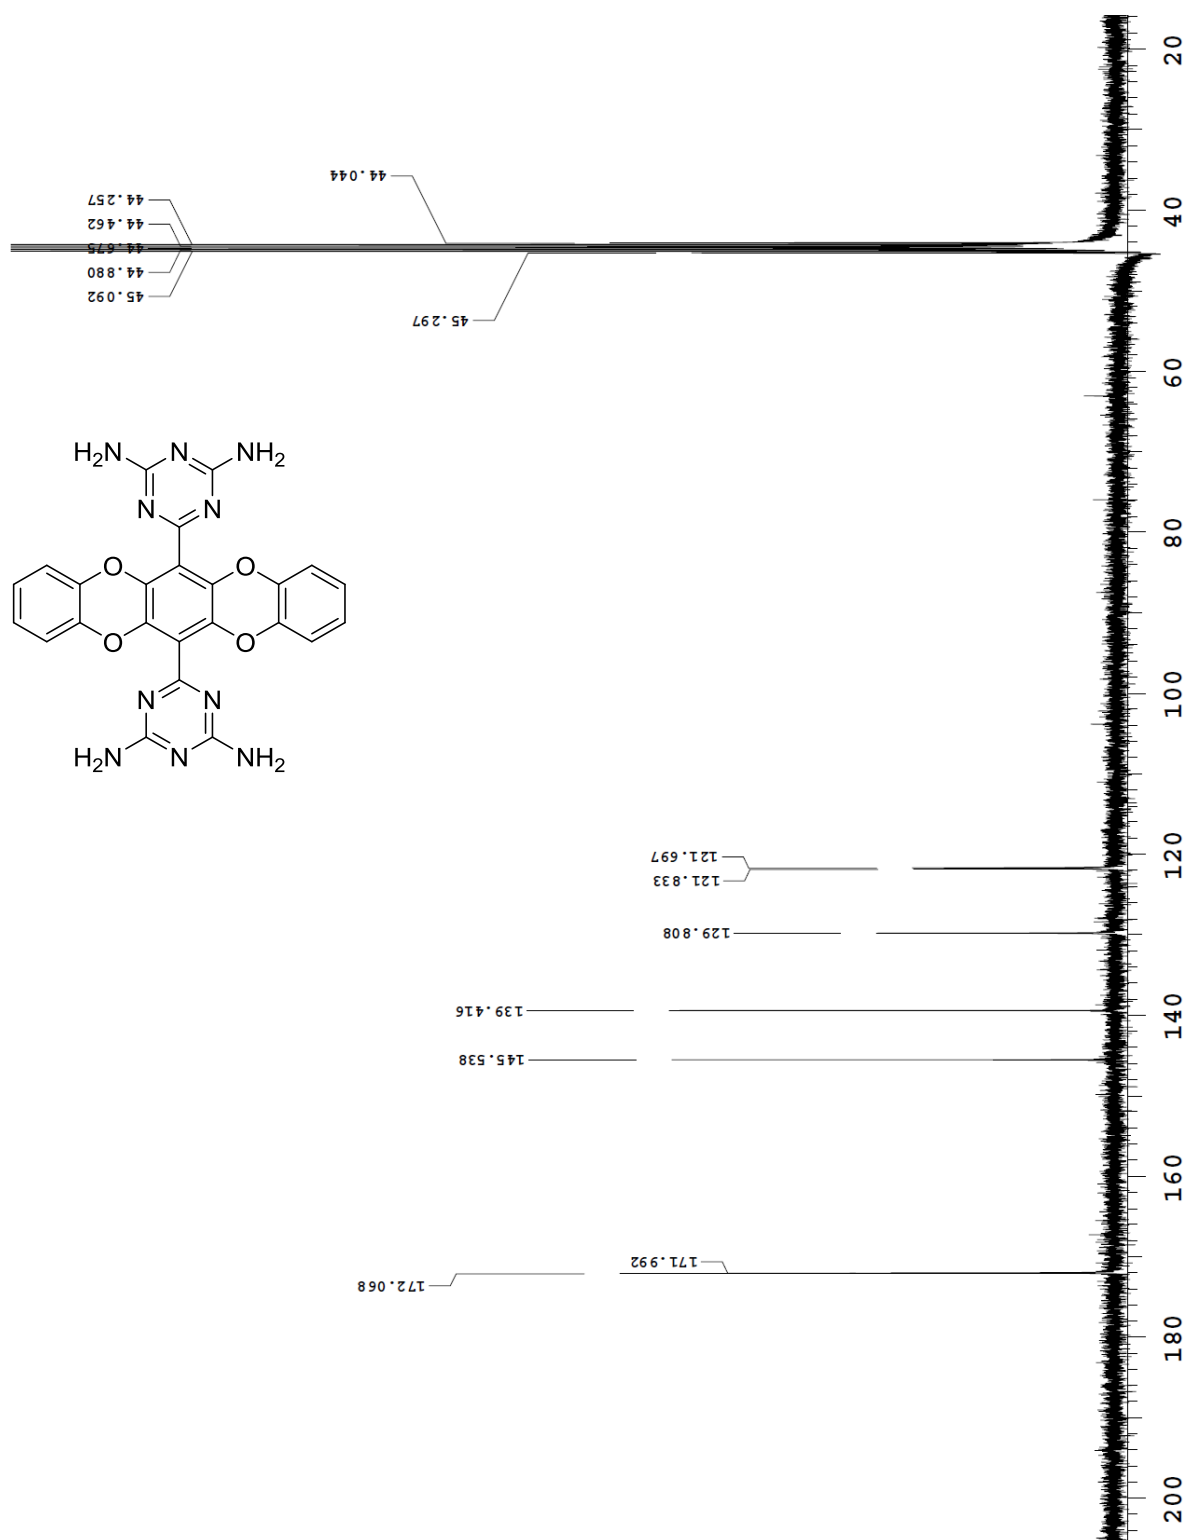

<sup>13</sup>C NMR spectrum of **1** in DMSO-*d*<sub>6</sub>.

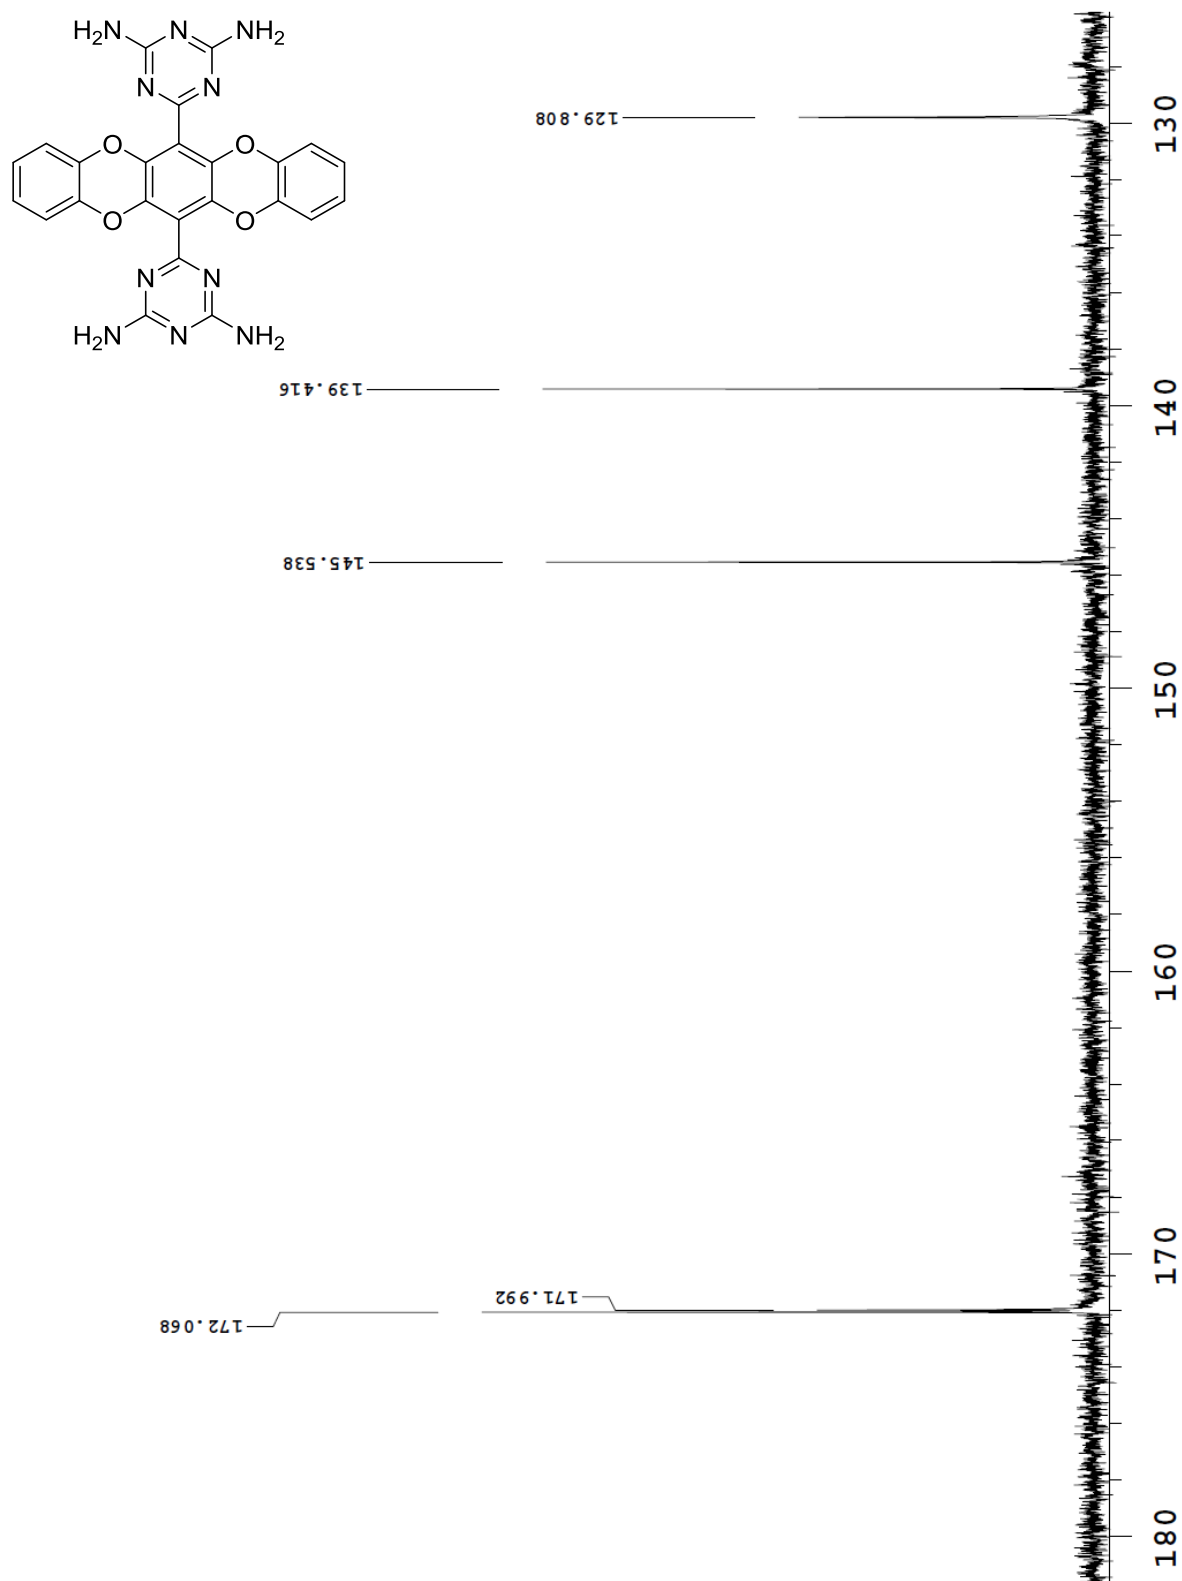

$^{13}\text{C}$  NMR spectrum of **1** in  $\text{DMSO}-d_6$  (expansion).
